# Supplementary material for: The OsSGS3-tasiRNA-OsARF3 module orchestrates abiotic-biotic stress response trade-off in rice
Source: PubMed Central journal article supplement (PMC10366173; doi:10.1038/s41467-023-40176-2), 2023-07-24
Supplement: 41467_2023_40176_MOESM3_ESM.pdf [file 41467_2023_40176_MOESM3_ESM.pdf]

## **Description of Additional Supplementary Files**

**Supplementary Data 1.** Daily temperature in Shanghai and Hainan

**Supplementary Data 2.** The results of LC-MS/MS analysis.

**Supplementary Data 3.** Summary of RNA-seq and small RNA profiles generated in this study.

**Supplementary Data 4.** Heat-related DGEs in heat-stressed 2537, *oss3a-1*, NIP, *osarf3ab* and *osarf3alb* knock-out mutants.

**Supplementary Data 5.** Immunity-related DGEs in NIP and OsSGS3 RNAi transgenic plants after inoculation with TH12 for 24 h.

**Supplementary Data 6.** Primers used in this study.

**Supplementary Data 7.** Statistical summary—a summary of all statistical analysis by ANOVA.
